# Supplementary material for: Health System’s Role in Facilitating Health Service Access among Persons with Spinal Cord Injury across 22 Countries
Source: MDPI journal article supplement (doi:10.3390/ijerph20116056), 2023-06-05
Supplement: s1 [file s1]

**Supplementary Table S1. Health system characteristics of InSCI countries**

| Country <sup>a</sup>                                                                                      | AU   | BR   | CN | FR   | DE   | GR  | ID | IT  | JP  | LT  | MY  | MA | NL  | NO  | PL  | RO  | ZA  | KR  | ES   | CH  | TH | USA  |
|-----------------------------------------------------------------------------------------------------------|------|------|----|------|------|-----|----|-----|-----|-----|-----|----|-----|-----|-----|-----|-----|-----|------|-----|----|------|
| SCI specialized centers <sup>b</sup>                                                                      | ≤ 10 | ≤ 10 | 0  | > 10 | > 10 | 0   | 0  | 0   | ≤ 5 | 0   | 0   | 0  | 0   | ≤ 5 | ≤ 5 | 0   | 0   | 0   | > 10 | ≤ 5 | 0  | > 10 |
| Hospital beds <sup>c</sup>                                                                                | 38   | 21   | 43 | 60   | 80   | 42  | 10 | 32  | 131 | 64  | 19  | 10 | 33  | 36  | 66  | 69  | 123 | 23  | 30   | 47  | 21 | 29   |
| Medical doctors <sup>c</sup>                                                                              | 37   | 22   | 20 | 33   | 43   | 62  | 4  | 40  | 25  | 45  | 19  | 7  | 36  | 47  | 24  | 30  | 24  | 8   | 39   | 43  | 8  | 26   |
| Nursing and midwifery personnel <sup>c</sup>                                                              | 131  | 74   | 31 | 118  | 142  | 37  | 40 | 63  | 120 | 101 | 35  | 14 | 116 | 184 | 69  | 74  | 82  | 50  | 61   | 183 | 32 | 157  |
| Physiotherapists <sup>c</sup>                                                                             | 9    | 8    | 0  | 13   | 23   | 8   | 0  | 10  | 5   | 12  | 0   | 0  | 19  | 24  | 7   | 1   | 7   | 1   | 11   | 13  | 1  | 7    |
| Pharmacists <sup>c</sup>                                                                                  | 9    | 7    | 3  | 11   | 7    | 11  | 2  | 12  | 19  | 10  | 4   | 3  | 2   | 8   | 8   | 9   | 7   | 3   | 12   | 7   | 4  | 9    |
| Dentists <sup>c</sup>                                                                                     | 6    | 13   | 5  | 6    | 9    | 13  | 1  | 8   | 8   | 10  | 3   | 1  | 6   | 9   | 4   | 8   | 5   | 1   | 8    | 5   | 2  | 6    |
| Healthcare Access and Quality Index <sup>d</sup>                                                          | 96   | 64   | 78 | 92   | 92   | 90  | 44 | 95  | 94  | 80  | 68  | 58 | 96  | 97  | 82  | 78  | 50  | 90  | 92   | 96  | 69 | 89   |
| Percentage of population that has social protection <sup>e</sup>                                          | 100  | 100  | 97 | 100  | 89   | 100 | 59 | 100 | 100 | 94  | 100 | 42 | 100 | 100 | 93  | 100 | 94  | 100 | 99   | 100 | 98 | 36   |
| UHC Index of Service Coverage <sup>f</sup>                                                                | 87   | 75   | 82 | 84   | 86   | 78  | 59 | 83  | 85  | 70  | 76  | 73 | 86  | 86  | 74  | 71  | 87  | 67  | 86   | 87  | 83 | 83   |
| Population with household health expenditures > 10% of total household expenditure or income <sup>g</sup> | 3    | 12   | 24 | 1    | 2    | 17  | 5  | 9   | 10  | 13  | 2   | 21 | 5   | 5   | 13  | 13  | 12  | 1   | 7    | 20  | 2  | 4    |
| Out-of-pocket expenditure as percentage of current health expenditure (%) <sup>h</sup>                    | 18   | 25   | 36 | 10   | 13   | 35  | 37 | 24  | 13  | 33  | 34  | 54 | 11  | 15  | 23  | 21  | 33  | 6   | 22   | 26  | 12 | 11   |
| Health expenditure as percentage of gross domestic product (%) <sup>i</sup>                               | 9    | 10   | 5  | 11   | 11   | 8   | 3  | 9   | 11  | 7   | 4   | 5  | 10  | 10  | 7   | 5   | 7   | 9   | 9    | 12  | 4  | 17   |
| Domestic general government health expenditure as percentage of gross domestic product (%) <sup>j</sup>   | 6    | 4    | 3  | 9    | 9    | 4   | 1  | 6   | 9   | 4   | 2   | 2  | 7   | 9   | 5   | 4   | 4   | 5   | 6    | 4   | 3  | 9    |

<sup>a</sup> AU – Australia, BR – Brazil, CN – China, FR – France, DE – Germany, GR – Greece, ID – Indonesia, IT – Italy, JP – Japan, LT – Lithuania, MY – Malaysia, MA – Morocco, NL – the Netherlands, NO – Norway, PL – Poland, RO – Romania, ZA – South Africa, KR – South Korea, ES – Spain, CH – Switzerland, TH – Thailand, USA – the United States

<sup>b</sup> Number of specialized SCI centers according to InSCI Country profiles [57] and experts within the InSCI network

<sup>c</sup> Number per 10,000 population. Data from WHO The Global Health Observatory [58]

<sup>d</sup> Healthcare Access and Quality Index, 2016: personal health-care access and quality index based on mortality from causes amenable to personal health care in 195 countries and territories (0-100). Different health service areas were covered by 32 amenable causes: infectious diseases, maternal and child health; non-communicable diseases; vaccine-preventable diseases; gastrointestinal conditions from which surgery can easily avert death. [59]

<sup>e</sup> Data from OECD data, Percentage of population that has social protection [60], supplemented by indicators from Our World in Data [61]

<sup>f</sup> UHC Index of Service Coverage: "coverage of essential health services (defined as the average coverage of essential services based on tracer interventions that include reproductive, maternal, newborn and child health, infectious diseases, non-communicable diseases and service capacity and access, among the general and the most disadvantaged population). The indicator is an index reported on a unitless scale of 0 to 100, which is computed as the geometric mean of 14 tracer indicators of health service coverage. The tracer indicators are as follows, organized by four components of service coverage: 1. Reproductive, maternal, newborn and child health 2. Infectious diseases 3. Noncommunicable diseases 4. Service capacity and access ". Data from WHO The Global Health Observatory, UHC Index of Service Coverage. [40]

<sup>g</sup> Data from WHO The Global Health Observatory, Population with household health expenditures greater than 10% of total household expenditure or income [63].

<sup>h</sup> Data from WHO The Global Health Observatory, Out-of-pocket expenditure as percentage of current health expenditure (%) [64].

<sup>i</sup> Data from WHO The Global Health Observatory, Current health expenditure as percentage of gross domestic product (%) [65].

<sup>j</sup> Data from WHO The Global Health Observatory, Domestic general government health expenditure as percentage of gross domestic product (%) [66].
