# Supplementary material for: Health System’s Role in Facilitating Health Service Access among Persons with Spinal Cord Injury across 22 Countries
Source: MDPI journal article supplement (doi:10.3390/ijerph20116056), 2023-06-05
Supplement: s1 [file s1]

Supplementary Table S3. Health status characteristics of study participants

| Country <sup>a</sup>                  | Total          | AU             | BR            | CN             | FR            | DE             | GR            | ID            | IT            | JP            | LT            | MY            | MA            | NL            | NO            | PL            | RO            | ZA            | KR            | ES            | CH            | TH            | USA           |
|---------------------------------------|----------------|----------------|---------------|----------------|---------------|----------------|---------------|---------------|---------------|---------------|---------------|---------------|---------------|---------------|---------------|---------------|---------------|---------------|---------------|---------------|---------------|---------------|---------------|
| Total population, n                   | 12588          | 1579           | 201           | 1354           | 412           | 1617           | 200           | 201           | 206           | 302           | 218           | 297           | 385           | 260           | 609           | 971           | 216           | 200           | 890           | 417           | 1530          | 320           | 203           |
| Characteristics, n (%) <sup>b</sup>   |                |                |               |                |               |                |               |               |               |               |               |               |               |               |               |               |               |               |               |               |               |               |               |
| Tetraplegia                           | 4582<br>(36.4) | 580<br>(38.9)  | 81<br>(40.3)  | 448<br>(33.1)  | 136<br>(32.9) | 758<br>(46.9)  | 64<br>(32.2)  | 20<br>(10.3)  | 53<br>(26.2)  | 148<br>(49.0) | 65<br>(29.8)  | 88<br>(29.6)  | 100<br>(26.0) | 98<br>(37.7)  | 239<br>(39.2) | 444<br>(45.7) | 66<br>(30.6)  | 77<br>(38.5)  | 349<br>(39.2) | 150<br>(36.0) | 458<br>(29.9) | 82<br>(25.6)  | 78<br>(38.4)  |
| Incomplete lesion                     | 7599<br>(60.4) | 1042<br>(66.0) | 159<br>(79.1) | 1009<br>(74.5) | 233<br>(56.6) | 1051<br>(65.0) | 107<br>(53.5) | 116<br>(57.7) | 125<br>(60.7) | 108<br>(35.8) | 55<br>(25.3)  | 176<br>(59.3) | 213<br>(55.3) | 183<br>(70.4) | 481<br>(79.0) | 525<br>(54.1) | 145<br>(67.1) | 94<br>(47.0)  | 372<br>(41.8) | 226<br>(54.2) | 859<br>(56.1) | 175<br>(54.7) | 145<br>(71.4) |
| Nontraumatic etiology                 | 2397<br>(19.0) | 258<br>(16.3)  | 60<br>(29.9)  | 438<br>(32.3)  | 77<br>(18.7)  | 327<br>(20.2)  | 28<br>(14.0)  | 24<br>(11.9)  | 61<br>(29.6)  | 30<br>(9.9)   | 14<br>(6.4)   | 43<br>(14.5)  | 87<br>(22.6)  | 95<br>(36.5)  | 183<br>(30.0) | 104<br>(10.7) | 35<br>(16.2)  | 15<br>(7.5)   | 69<br>(7.8)   | 93<br>(22.3)  | 312<br>(20.4) | 44<br>(13.8)  | 0<br>(0.0)    |
| Years since injury – mean             | 13.1<br>(0.0,  | 17.2<br>(1.0,  | 3.3<br>(0.0,  | 4.6<br>(0.0,   | 18.1<br>(0.0, | 12.9<br>(0.0,  | 15.0<br>(1.0, | 11.0<br>(0.0, | 12.1<br>(0.0, | 20.0<br>(1.0, | 15.7<br>(0.0, | 9.2<br>(0.0,  | 7.0<br>(0.0,  | 15.2<br>(0.0, | 8.3<br>(1.0,  | 13.8<br>(1.0, | 8.2<br>(0.0,  | 10.3<br>(0.0, | 15.6<br>(0.0, | 16.3<br>(1.0, | 19.1<br>(1.0, | 8.3<br>(0.0,  | 12.7<br>(0.0, |
| (min, max)                            | 81.0)          | 73.0)          | 33.0)         | 54.0)          | 69.0)         | 61.0)          | 45.0)         | 42.0)         | 47.0)         | 58.0)         | 47.0)         | 47.0)         | 48.0)         | 61.0)         | 45.0)         | 58.0)         | 39.0)         | 49.0)         | 63.0)         | 65.0)         | 81.0)         | 48.0)         | 60.0)         |
| SCI-SCS <sup>c</sup> – mean           | 17.1<br>(0.0,  | 18.4<br>(0.0,  | 11.0<br>(0.0, | 11.1<br>(0.0,  | 14.4<br>(0.0, | 19.6<br>(0.0,  | 14.5<br>(0.0, | 13.5<br>(0.0, | 18.1<br>(0.0, | 17.7<br>(0.0, | 18.4<br>(2.0, | 15.9<br>(0.0, | 17.4<br>(0.0, | 14.2<br>(0.0, | 15.0<br>(0.0, | 19.4<br>(0.0, | 16.0<br>(1.0, | 13.8<br>(0.0, | 26.9<br>(0.0, | 16.9<br>(0.0, | 18.0<br>(0.0, | 12.6<br>(0.0, | 15.0<br>(0.0, |
| (min, max)                            | 56.0)          | 54.0)          | 41.0)         | 56.0)          | 33.0)         | 56.0)          | 41.0)         | 46.0)         | 47.0)         | 46.0)         | 56.0)         | 48.0)         | 43.0)         | 42.0)         | 48.0)         | 54.0)         | 44.0)         | 39.0)         | 56.0)         | 44.0)         | 53.0)         | 53.0)         | 41.0)         |
| SCIM <sup>d</sup> – mean (min, max)   | 40.0<br>(0.0,  | 40.6<br>(1.0,  | 34.0<br>(0.0, | 43.9<br>(0.0,  | 44.8<br>(5.0, | 38.1<br>(0.0,  | 39.1<br>(1.0, | 42.2<br>(0.0, | 39.8<br>(0.0, | 33.7<br>(1.0, | 38.2<br>(1.0, | 38.0<br>(1.0, | 33.8<br>(0.0, | 44.7<br>(1.0, | 50.4<br>(3.0, | 37.9<br>(0.0, | 39.5<br>(5.0, | 35.7<br>(1.0, | 27.6<br>(0.0, | 39.7<br>(1.0, | 45.9<br>(1.0, | 38.5<br>(0.0, | 43.4<br>(7.0, |
|                                       | 66.0)          | 66.0)          | 66.0)         | 66.0)          | 66.0)         | 66.0)          | 65.0)         | 66.0)         | 61.0)         | 64.0)         | 66.0)         | 66.0)         | 66.0)         | 66.0)         | 66.0)         | 66.0)         | 66.0)         | 66.0)         | 66.0)         | 66.0)         | 66.0)         | 66.0)         | 66.0)         |
| Confidence in maintaining good health |                |                |               |                |               |                |               |               |               |               |               |               |               |               |               |               |               |               |               |               |               |               |               |
| No / little                           | 2652<br>(21.1) | 286<br>(18.1)  | 42<br>(20.9)  | 289<br>(21.3)  | 71<br>(17.2)  | 480<br>(29.7)  | 36<br>(18.0)  | 37<br>(18.4)  | 56<br>(27.2)  | 115<br>(38.1) | 38<br>(17.4)  | 34<br>(11.4)  | 91<br>(23.6)  | 56<br>(21.5)  | 128<br>(21.0) | 120<br>(12.4) | 33<br>(15.3)  | 21<br>(10.5)  | 346<br>(38.9) | 85<br>(20.4)  | 234<br>(15.3) | 32<br>(10.0)  | 22<br>(10.8)  |
| Moderate                              | 3954<br>(31.4) | 482<br>(30.5)  | 43<br>(21.4)  | 485<br>(35.8)  | 117<br>(28.4) | 536<br>(33.1)  | 66<br>(33.0)  | 52<br>(25.9)  | 73<br>(35.4)  | 114<br>(37.7) | 84<br>(38.5)  | 59<br>(19.9)  | 118<br>(30.6) | 103<br>(39.6) | 206<br>(33.8) | 303<br>(31.2) | 70<br>(32.4)  | 44<br>(22.0)  | 334<br>(37.5) | 134<br>(32.1) | 400<br>(26.1) | 74<br>(23.1)  | 57<br>(28.1)  |
| Completely / a lot                    | 5370<br>(42.7) | 742<br>(47.0)  | 115<br>(57.2) | 580<br>(42.8)  | 203<br>(49.3) | 503<br>(31.1)  | 86<br>(43.0)  | 105<br>(52.2) | 64<br>(31.1)  | 64<br>(21.2)  | 94<br>(43.1)  | 191<br>(64.3) | 176<br>(45.7) | 91<br>(35.0)  | 263<br>(43.2) | 521<br>(53.7) | 109<br>(50.5) | 133<br>(66.5) | 193<br>(21.7) | 184<br>(44.1) | 623<br>(40.7) | 210<br>(65.6) | 120<br>(59.1) |
| Satisfaction with own health          |                |                |               |                |               |                |               |               |               |               |               |               |               |               |               |               |               |               |               |               |               |               |               |
| (Very) disappointed                   | 3658<br>(29.1) | 417<br>(26.4)  | 45<br>(22.4)  | 447<br>(33.0)  | 131<br>(31.8) | 570<br>(35.3)  | 38<br>(19.0)  | 39<br>(19.4)  | 53<br>(25.7)  | 114<br>(37.7) | 48<br>(22.0)  | 40<br>(13.5)  | 95<br>(24.7)  | 61<br>(23.5)  | 159<br>(26.1) | 398<br>(41.0) | 42<br>(19.4)  | 26<br>(13.0)  | 461<br>(51.8) | 141<br>(33.8) | 248<br>(16.2) | 44<br>(13.8)  | 41<br>(20.2)  |
| Neither                               | 3557<br>(28.3) | 386<br>(24.4)  | 51<br>(25.4)  | 525<br>(38.8)  | 127<br>(30.8) | 371<br>(22.9)  | 51<br>(25.5)  | 71<br>(35.3)  | 70<br>(34.0)  | 107<br>(35.4) | 96<br>(44.0)  | 71<br>(23.9)  | 111<br>(28.8) | 76<br>(29.2)  | 206<br>(33.8) | 292<br>(30.1) | 64<br>(29.6)  | 36<br>(18.0)  | 251<br>(28.2) | 115<br>(27.6) | 301<br>(19.7) | 127<br>(39.7) | 52<br>(25.6)  |
| (Very) satisfied                      | 4850<br>(38.5) | 716<br>(45.3)  | 105<br>(52.2) | 382<br>(28.2)  | 138<br>(33.5) | 633<br>(39.1)  | 98<br>(49.0)  | 88<br>(43.8)  | 71<br>(34.5)  | 78<br>(25.8)  | 72<br>(33.0)  | 177<br>(59.6) | 179<br>(46.5) | 113<br>(43.5) | 237<br>(38.9) | 253<br>(26.1) | 108<br>(50.0) | 137<br>(68.5) | 143<br>(16.1) | 154<br>(36.9) | 715<br>(46.7) | 147<br>(45.9) | 106<br>(52.2) |
| Rating of own health                  |                |                |               |                |               |                |               |               |               |               |               |               |               |               |               |               |               |               |               |               |               |               |               |
| Fair / poor                           | 5590<br>(44.4) | 519<br>(32.9)  | 64<br>(31.8)  | 807<br>(59.6)  | 167<br>(40.5) | 679<br>(42.0)  | 70<br>(35.0)  | 53<br>(26.4)  | 88<br>(42.7)  | 185<br>(61.3) | 76<br>(34.9)  | 89<br>(30.0)  | 297<br>(77.1) | 86<br>(33.1)  | 228<br>(37.4) | 512<br>(52.7) | 71<br>(32.9)  | 50<br>(25.0)  | 567<br>(63.7) | 210<br>(50.4) | 613<br>(40.1) | 121<br>(37.8) | 38<br>(18.7)  |
| Moderate                              | 4853<br>(38.6) | 584<br>(37.0)  | 94<br>(46.8)  | 442<br>(32.6)  | 187<br>(45.4) | 712<br>(44.0)  | 60<br>(30.0)  | 124<br>(61.7) | 81<br>(39.3)  | 76<br>(25.2)  | 90<br>(41.3)  | 131<br>(44.1) | 65<br>(16.9)  | 132<br>(50.8) | 250<br>(41.1) | 369<br>(52.3) | 113<br>(52.3) | 73<br>(36.5)  | 238<br>(26.7) | 147<br>(35.3) | 671<br>(43.9) | 140<br>(43.8) | 74<br>(36.5)  |
| Excellent / very good                 | 1872<br>(14.9) | 410<br>(26.0)  | 43<br>(21.4)  | 105<br>(7.8)   | 47<br>(11.4)  | 180<br>(11.1)  | 57<br>(28.5)  | 18<br>(9.0)   | 26<br>(12.6)  | 38<br>(12.6)  | 49<br>(22.5)  | 68<br>(22.9)  | 23<br>(6.0)   | 34<br>(13.1)  | 123<br>(20.2) | 64<br>(6.6)   | 30<br>(13.9)  | 75<br>(37.5)  | 48<br>(5.4)   | 54<br>(12.9)  | 234<br>(15.3) | 58<br>(18.1)  | 88<br>(43.3)  |

<sup>a</sup> AU – Australia, BR – Brazil, CN – China, FR – France, DE – Germany, GR – Greece, ID – Indonesia, IT – Italy, JP – Japan, LT – Lithuania, MY – Malaysia, MA – Morocco, NL – Netherlands, NO – Norway, PL – Poland, RO – Romania,

ZA – South Africa, KR – South Korea, ES – Spain, CH – Switzerland, TH – Thailand, USA – the United States

<sup>b</sup> Missing values: SCI degree: 2.9%, SCI type: 1.3%, time since sci: 2.7%, SCI-SCS: 14.2%, SCIM: 21.4%, confidence in maintaining good health: 4.9%, satisfaction with own health: 4.2%, rating of own health: 2.2%

<sup>c</sup> Spinal Cord Injury Secondary Health Conditions Scale (range: 0-56) based on self-rated question about 14 health problems

<sup>d</sup> Spinal Cord Independence Measure (range: 0-66): a measure of independence in activities of daily living score
