# Supplementary material for: Health System’s Role in Facilitating Health Service Access among Persons with Spinal Cord Injury across 22 Countries
Source: MDPI journal article supplement (doi:10.3390/ijerph20116056), 2023-06-05
Supplement: s1 [file s1]

Supplementary Table S2. Socio-demographic characteristics of study participants

| Country*                            | Total        | AU           | BR           | CN           | FR           | DE           | GR           | ID           | IT           | JP           | LT           | MY           | MA           | NL           | NO           | PL           | RO           | ZA           | KR           | ES           | CH           | TH           | USA    |
|-------------------------------------|--------------|--------------|--------------|--------------|--------------|--------------|--------------|--------------|--------------|--------------|--------------|--------------|--------------|--------------|--------------|--------------|--------------|--------------|--------------|--------------|--------------|--------------|--------|
| Total population, n                 | 12588        | 1579         | 201          | 1354         | 412          | 1617         | 200          | 201          | 206          | 302          | 218          | 297          | 385          | 260          | 609          | 971          | 216          | 200          | 890          | 417          | 1530         | 320          | 203    |
| Characteristics, n (%) <sup>a</sup> |              |              |              |              |              |              |              |              |              |              |              |              |              |              |              |              |              |              |              |              |              |              |        |
| Female                              | 3391         | 422          | 42           | 391          | 112          | 447          | 54           | 66           | 53           | 47           | 81           | 61           | 106          | 87           | 192          | 164          | 60           | 50           | 214          | 125          | 440          | 92           | 85     |
|                                     | (26.9)       | (26.7)       | (20.9)       | (28.9)       | (27.2)       | (27.6)       | (26.9)       | (32.8)       | (25.7)       | (15.6)       | (37.2)       | (20.5)       | (27.5)       | (33.5)       | (31.5)       | (16.9)       | (27.8)       | (25.0)       | (24.0)       | (30.0)       | (28.8)       | (28.8)       | (41.9) |
| Age – mean (min, max)               | 51.3         | 57.5         | 44.2         | 49.7         | 51.6         | 55.4         | 46.7         | 43.8         | 50.9         | 54.8         | 42.3         | 40.1         | 38.6         | 58.6         | 57.2         | 46.8         | 38.2         | 38.4         | 48.0         | 51.3         | 57.2         | 45.0         | 45.0   |
|                                     | (18.0, 96.0) | (19.0, 94.0) | (19.0, 86.0) | (18.0, 91.0) | (21.0, 93.0) | (18.0, 91.0) | (22.0, 82.0) | (19.0, 83.0) | (20.0, 85.0) | (18.0, 70.0) | (18.0, 75.0) | (19.0, 89.0) | (19.0, 90.0) | (18.0, 96.0) | (19.0, 87.0) | (19.0, 74.0) | (18.0, 72.0) | (19.0, 82.0) | (19.0, 89.0) | (20.0, 93.0) | (19.0, 79.0) | (19.0, 76.0) |        |
| Migrant background                  | 951          | 359          | 0            | 0            | 26           | 111          | 25           | 0            | 14           | 1            | 2            | 3            | 2            | 20           | 46           | 7            | 1            | 7            | 2            | 27           | 281          | 1            | 16     |
|                                     | (7.6)        | (22.7)       | (0.0)        | (0.0)        | (6.3)        | (6.9)        | (12.6)       | (0.0)        | (6.8)        | (0.3)        | (0.9)        | (1.0)        | (0.5)        | (7.7)        | (7.6)        | (0.7)        | (0.5)        | (3.5)        | (0.2)        | (6.5)        | (18.4)       | (0.3)        | (7.9)  |
| Living in institution               | 413          | 55           | 0            | 32           | 6            | 54           | 1            | 32           | 4            | 5            | 0            | 14           | 3            | 5            | 15           | 38           | 1            | 55           | 9            | 8            | 52           | 23           | 1      |
|                                     | (3.3)        | (3.5)        | (0.0)        | (2.4)        | (1.5)        | (3.3)        | (0.5)        | (15.9)       | (1.9)        | (1.7)        | (0.0)        | (4.7)        | (0.8)        | (1.9)        | (2.5)        | (3.9)        | (0.5)        | (27.5)       | (1.0)        | (1.9)        | (3.4)        | (7.2)        | (0.5)  |
| No assistance                       | 3095         | 428          | 41           | 418          | 120          | 197          | 34           | 60           | 71           | 27           | 43           | 65           | 45           | 112          | 313          | 148          | 31           | 54           | 136          | 109          | 464          | 91           | 88     |
|                                     | (24.6)       | (27.1)       | (20.4)       | (30.9)       | (29.1)       | (12.2)       | (17.0)       | (29.9)       | (34.5)       | (8.9)        | (19.7)       | (21.9)       | (11.7)       | (43.1)       | (51.4)       | (15.2)       | (14.4)       | (27.0)       | (15.3)       | (26.1)       | (30.3)       | (28.4)       | (43.3) |
| No education                        | 152          | 2            | 4            | 41           | 9            | 0            | 1            | 4            | 0            | 0            | 0            | 0            | 69           | 6            | 0            | 1            | 0            | 0            | 4            | 0            | 0            | 11           | 0      |
|                                     | (1.2)        | (0.1)        | (2.0)        | (3.0)        | (2.2)        | (0.0)        | (0.5)        | (2.0)        | (0.0)        | (0.0)        | (0.0)        | (0.0)        | (17.9)       | (2.3)        | (0.0)        | (0.1)        | (0.0)        | (0.0)        | (0.4)        | (0.0)        | (0.0)        | (3.4)        | (0.0)  |
| Income decile                       |              |              |              |              |              |              |              |              |              |              |              |              |              |              |              |              |              |              |              |              |              |              |        |
| 1-3                                 | 5578         | 224          | 53           | 379          | 268          | 985          | 118          | 0            | 115          | 162          | 122          | 0            | 339          | 127          | 432          | 580          | 68           | 60           | 577          | 208          | 514          | 216          | 31     |
|                                     | (44.3)       | (14.2)       | (26.4)       | (28.0)       | (65.0)       | (60.9)       | (59.0)       | (0.0)        | (55.8)       | (53.6)       | (56.0)       | (0.0)        | (88.1)       | (48.8)       | (70.9)       | (59.7)       | (31.5)       | (30.0)       | (64.8)       | (49.9)       | (33.6)       | (67.5)       | (15.3) |
| 4-7                                 | 3380         | 496          | 38           | 659          | 96           | 354          | 53           | 0            | 66           | 5            | 91           | 0            | 40           | 73           | 101          | 213          | 71           | 94           | 171          | 129          | 475          | 76           | 59     |
|                                     | (26.9)       | (31.4)       | (28.9)       | (48.7)       | (23.3)       | (21.9)       | (26.5)       | (0.0)        | (32.0)       | (1.7)        | (41.7)       | (0.0)        | (10.4)       | (28.1)       | (16.6)       | (21.9)       | (32.9)       | (47.0)       | (19.2)       | (30.9)       | (31.0)       | (23.8)       | (29.1) |
| 8-10                                | 2085         | 656          | 88           | 316          | 18           | 79           | 26           | 0            | 17           | 112          | 3            | 0            | 6            | 31           | 46           | 127          | 74           | 43           | 103          | 52           | 174          | 19           | 95     |
|                                     | (16.6)       | (41.5)       | (43.8)       | (23.3)       | (4.4)        | (4.9)        | (13.0)       | (0.0)        | (8.3)        | (37.1)       | (1.4)        | (0.0)        | (1.6)        | (11.9)       | (7.6)        | (13.1)       | (34.3)       | (21.5)       | (11.6)       | (12.5)       | (11.4)       | (5.9)        | (46.8) |
| Have no paid work                   | 8046         | 1085         | 177          | 1096         | 282          | 1067         | 164          | 111          | 144          | 186          | 131          | 199          | 357          | 167          | 383          | 607          | 170          | 151          | 628          | 340          | 264          | 222          | 115    |
|                                     | (63.9)       | (68.7)       | (88.1)       | (80.9)       | (68.4)       | (66.0)       | (82.0)       | (55.2)       | (69.9)       | (61.6)       | (60.1)       | (67.0)       | (92.7)       | (64.2)       | (62.9)       | (62.5)       | (78.7)       | (75.5)       | (70.6)       | (81.5)       | (17.3)       | (69.4)       | (56.7) |
| Public transport use                |              |              |              |              |              |              |              |              |              |              |              |              |              |              |              |              |              |              |              |              |              |              |        |
| No / little problem                 | 4955         | 875          | 77           | 549          | 205          | 474          | 51           | 59           | 75           | 128          | 75           | 106          | 55           | 129          | 329          | 368          | 35           | 75           | 123          | 228          | 647          | 170          | 122    |
|                                     | (39.4)       | (55.4)       | (38.3)       | (40.5)       | (49.8)       | (29.3)       | (25.5)       | (29.4)       | (36.4)       | (42.4)       | (34.4)       | (35.7)       | (14.3)       | (49.6)       | (54.0)       | (37.9)       | (16.2)       | (37.5)       | (13.8)       | (54.7)       | (42.3)       | (53.1)       | (60.1) |
| Severe/ extreme problem             | 6610         | 544          | 123          | 805          | 175          | 969          | 140          | 138          | 121          | 138          | 141          | 175          | 330          | 113          | 261          | 532          | 176          | 125          | 759          | 162          | 484          | 143          | 56     |
|                                     | (52.5)       | (34.5)       | (61.2)       | (59.5)       | (42.5)       | (59.9)       | (70.0)       | (68.7)       | (58.7)       | (45.7)       | (64.7)       | (58.9)       | (85.7)       | (43.5)       | (42.9)       | (54.8)       | (81.5)       | (62.5)       | (85.3)       | (38.8)       | (31.6)       | (44.7)       | (27.6) |
| Private transport use               |              |              |              |              |              |              |              |              |              |              |              |              |              |              |              |              |              |              |              |              |              |              |        |
| No / little problem                 | 7860         | 1192         | 135          | 736          | 274          | 971          | 107          | 118          | 115          | 155          | 162          | 200          | 112          | 207          | 513          | 639          | 112          | 120          | 334          | 307          | 1015         | 169          | 167    |
|                                     | (62.4)       | (75.5)       | (67.2)       | (54.4)       | (66.5)       | (60.0)       | (53.5)       | (58.7)       | (55.8)       | (51.3)       | (74.3)       | (67.3)       | (29.1)       | (79.6)       | (84.2)       | (65.8)       | (51.9)       | (60.0)       | (37.5)       | (73.6)       | (66.3)       | (52.8)       | (82.3) |
| Severe/ extreme problem             | 4043         | 329          | 66           | 618          | 107          | 547          | 84           | 78           | 80           | 111          | 53           | 82           | 273          | 41           | 84           | 299          | 98           | 80           | 543          | 92           | 203          | 143          | 32     |
|                                     | (32.1)       | (20.8)       | (32.8)       | (45.6)       | (26.0)       | (33.8)       | (42.0)       | (38.8)       | (38.8)       | (36.8)       | (24.3)       | (27.6)       | (70.9)       | (15.8)       | (13.8)       | (30.8)       | (45.4)       | (40.0)       | (61.0)       | (22.1)       | (13.3)       | (44.7)       | (15.8) |
| Long-distance transport use         |              |              |              |              |              |              |              |              |              |              |              |              |              |              |              |              |              |              |              |              |              |              |        |
| No / little problem                 | 6443         | 1011         | 84           | 702          | 206          | 894          | 70           | 83           | 67           | 196          | 80           | 117          | 56           | 192          | 419          | 450          | 70           | 86           | 229          | 182          | 947          | 166          | 136    |
|                                     | (51.2)       | (64.0)       | (41.8)       | (51.8)       | (50.0)       | (55.3)       | (35.0)       | (41.3)       | (32.5)       | (64.9)       | (36.7)       | (39.4)       | (14.5)       | (73.8)       | (68.8)       | (46.3)       | (32.4)       | (43.0)       | (25.7)       | (43.6)       | (61.9)       | (51.9)       | (67.0) |
| Severe/ extreme problem             | 5710         | 508          | 116          | 652          | 182          | 603          | 119          | 113          | 125          | 93           | 136          | 166          | 329          | 60           | 169          | 488          | 141          | 113          | 643          | 223          | 520          | 152          | 59     |
|                                     | (45.4)       | (32.2)       | (57.7)       | (48.2)       | (44.2)       | (37.3)       | (59.5)       | (60.7)       | (60.7)       | (30.8)       | (62.4)       | (55.9)       | (85.5)       | (23.1)       | (27.8)       | (50.3)       | (65.3)       | (56.5)       | (72.2)       | (53.5)       | (34.0)       | (47.5)       | (29.1) |

\* AU – Australia, BR – Brazil, CN – China, FR – France, DE – Germany, GR – Greece, ID – Indonesia, IT – Italy, JP – Japan, LT – Lithuania, MY – Malaysia, MA – Morocco, NL – Netherlands, NO – Norway, PL – Poland, RO – Romania, ZA – South Africa, KR – South Korea, ES – Spain, CH – Switzerland, TH – Thailand, USA – the United States

<sup>b</sup>Missing values: sex: 0.3%, age: 0.6%, migrant background: 1.1%, living arrangement: 1.6%, assistance: 0.9%, education: 1.3%, income: 12.3%, paid work: 7.5%, public transport use: 8.1%, private transport use: 5.4%, long-distance transport use: 3.5%
